# Supplementary material for: Interspecific Hybridization and Complete Mitochondrial Genome Analysis of Two Ghost Moth Species
Source: MDPI journal article supplement (doi:10.3390/insects12111046), 2021-11-21
Supplement: s1 [file s1]

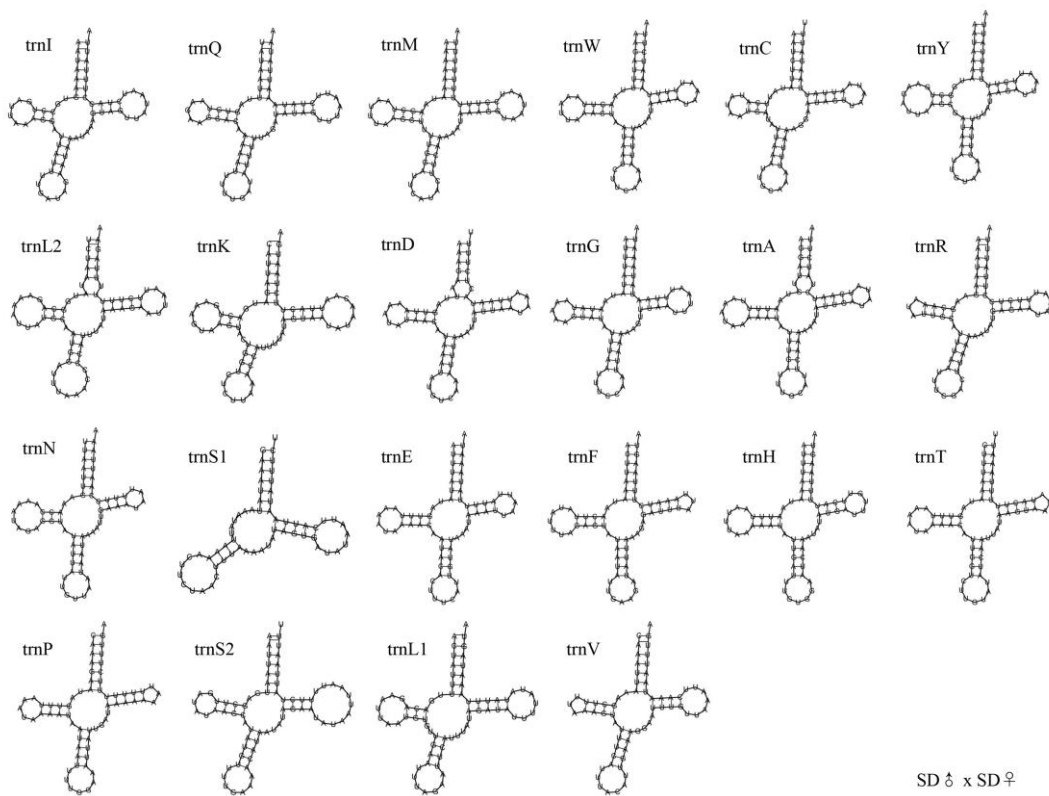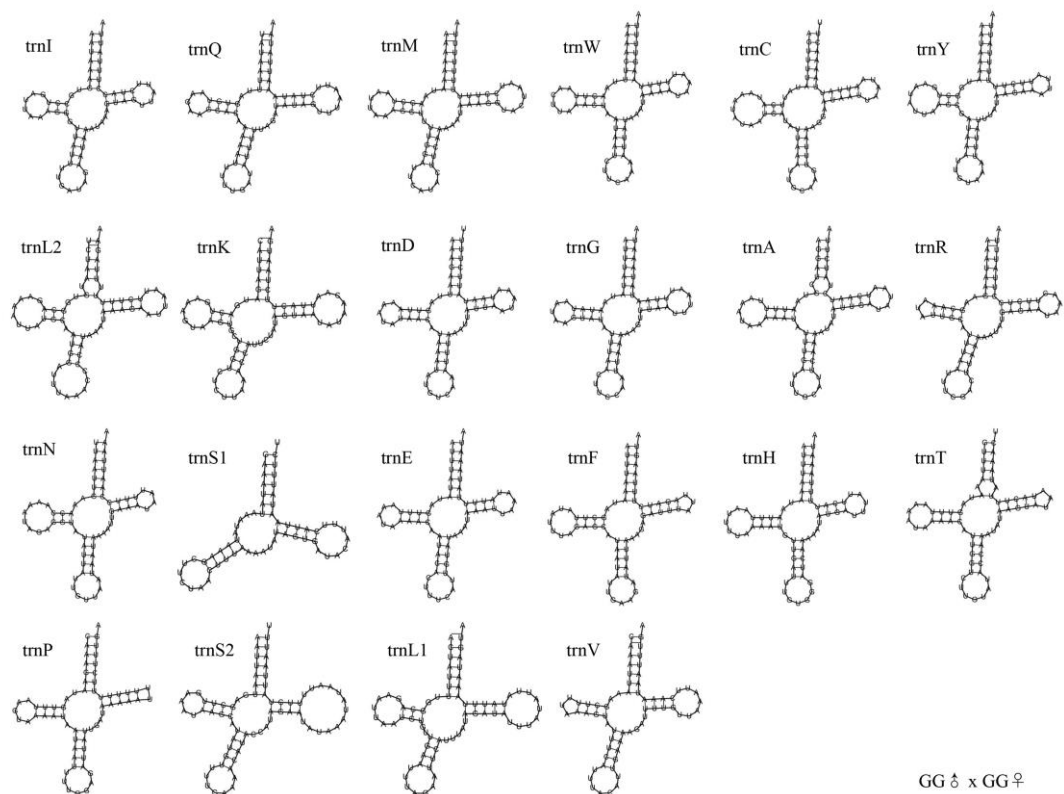

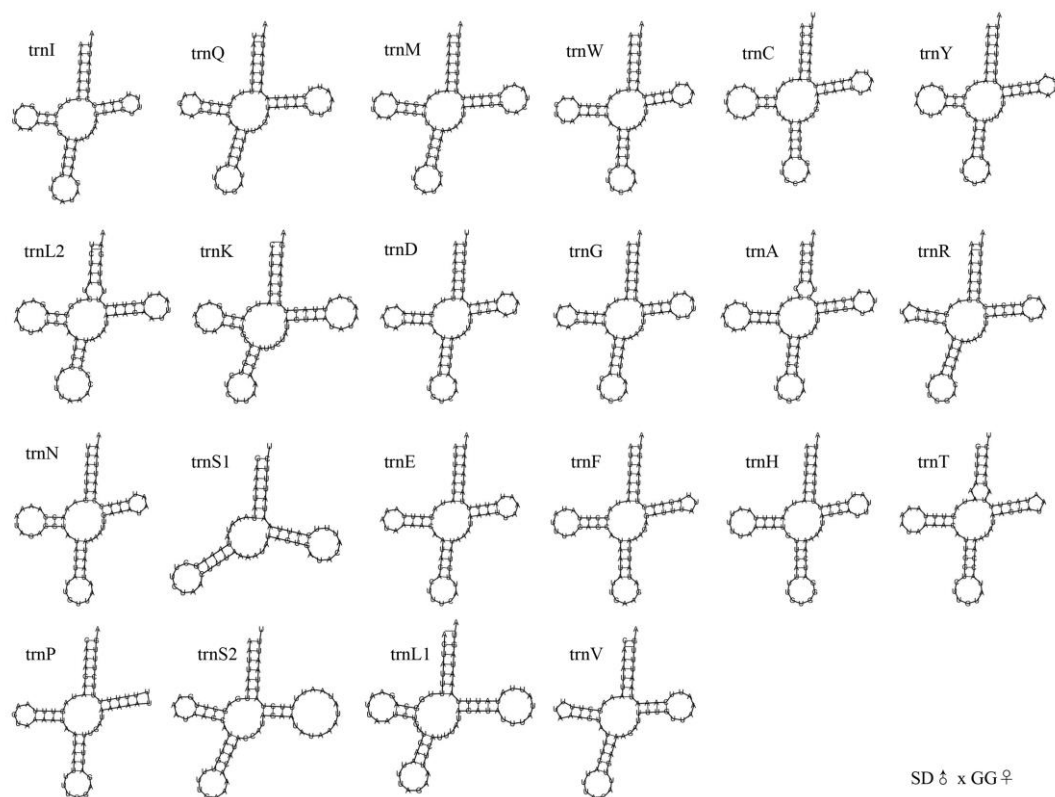

**Supplementary Figure S3.** Secondary structures of 22 tRNAs encoded by the *Thitarodes* mitochondrial genomes. The tRNAs are labeled with the abbreviations for their corresponding amino acids.
