# Supplementary material for: Interspecific Hybridization and Complete Mitochondrial Genome Analysis of Two Ghost Moth Species
Source: MDPI journal article supplement (doi:10.3390/insects12111046), 2021-11-21
Supplement: s1 [file s1]

**Supplementary Table S1.** Egg characters from the inbred and hybrid populations

| Combinations | Eggs in one<br>milliliter | The weight of one<br>thousand eggs (g) | Eggs per female | Hatching rates (%) |
|--------------|---------------------------|----------------------------------------|-----------------|--------------------|
| SD♂ x SD♀    | 3976±109 a                | 0.18±0.01 c                            | 512±3 a         | 24.16±1.76 a       |
| GG♂ x GG♀    | 2955±69 b                 | 0.31±0.02 a                            | 411±20 b        | 26.64±2.42 a       |
| SD♂ x GG♀    | 2800±73 b                 | 0.28±0.02 ab                           | 347±8 b         | 12.62±2.80 b       |

Note: the columns with the same letters indicated no significant differences ( $p>0.05$ ).
