# Supplementary material for: Interspecific Hybridization and Complete Mitochondrial Genome Analysis of Two Ghost Moth Species
Source: MDPI journal article supplement (doi:10.3390/insects12111046), 2021-11-21
Supplement: s1 [file s1]

**Supplementary Table S3.** Fresh weight of infected and uninfected larvae at 120 days post infection with different

*O. sinensis* fungal strains

| Fungal Strains          | GG♂ x GG♀   | SD♂ x SD♀   |
|-------------------------|-------------|-------------|
| KD                      | 0.67±0.04 A | 0.53±0.04 a |
| XZ                      | 0.67±0.05 A | 0.53±0.04 a |
| QH                      | 0.65±0.05 A | 0.53±0.03 a |
| YN                      | 0.58±0.03 A | 0.54±0.04 a |
| PBS (Solvent control)   | 0.60±0.03 A | 0.56±0.04 a |
| CK (Uninfected control) | 0.59±0.02 A | 0.47±0.02 a |

Note: Means (±SE) within a column followed by the same letter are not significantly different (p>0.05).
