# Supplementary material for: Interspecific Hybridization and Complete Mitochondrial Genome Analysis of Two Ghost Moth Species
Source: MDPI journal article supplement (doi:10.3390/insects12111046), 2021-11-21
Supplement: s1 [file s1]

(a) *atp6*

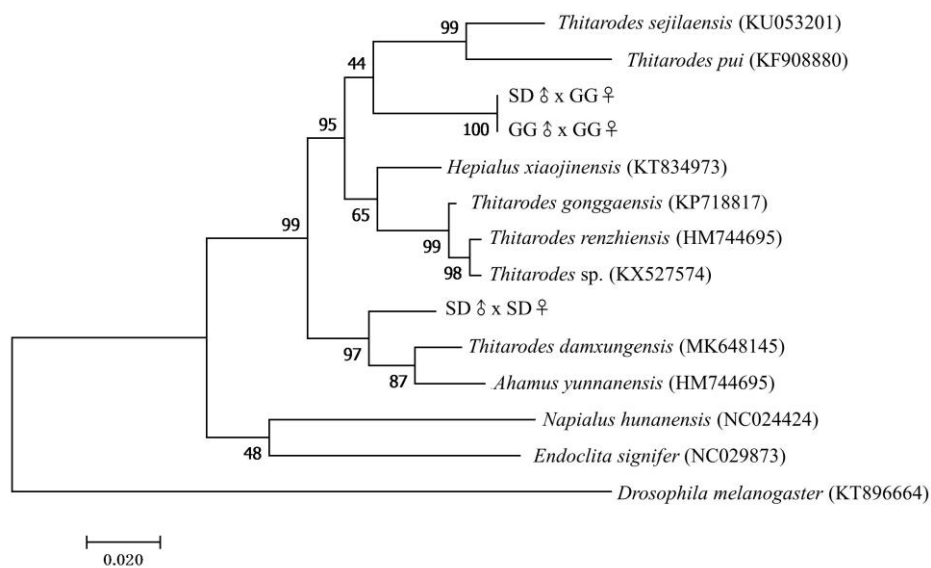

(b) *atp8*

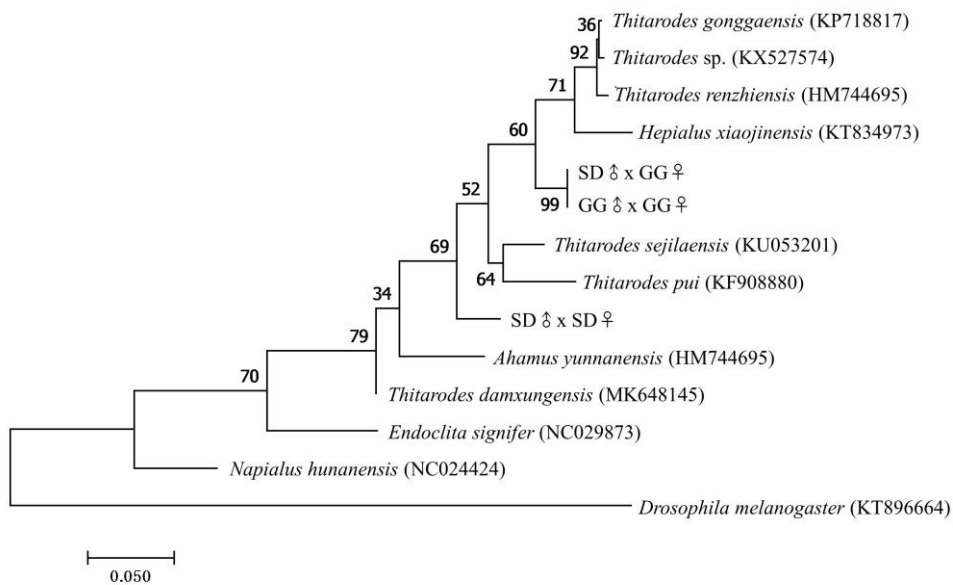

**(c) *cytb***

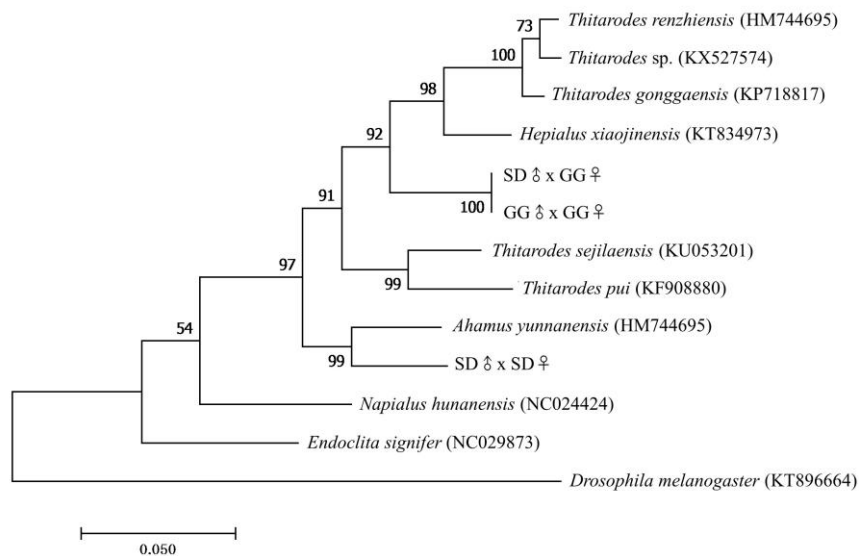

**(d) *cox1***

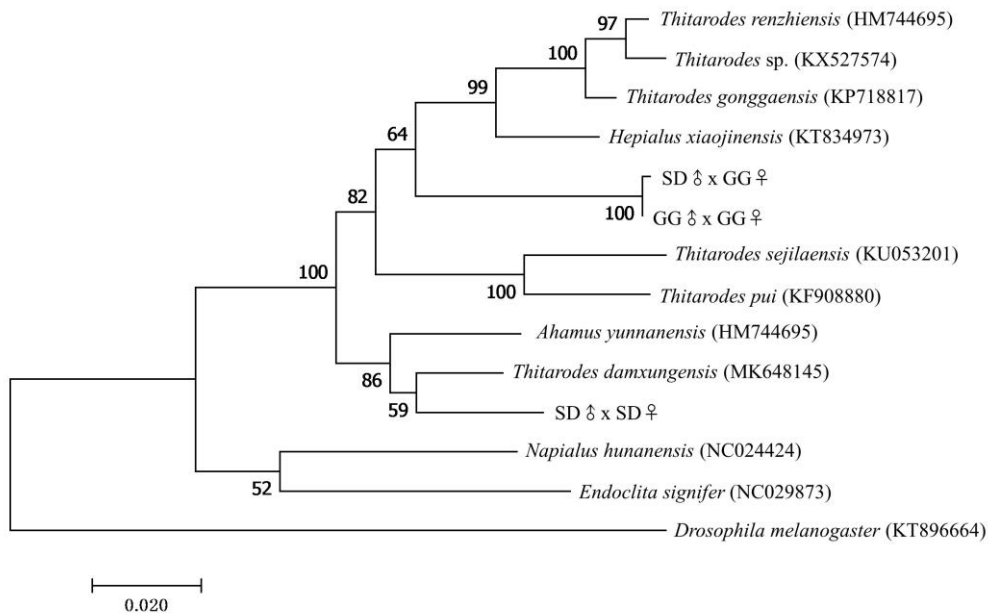

(e) *cox2*

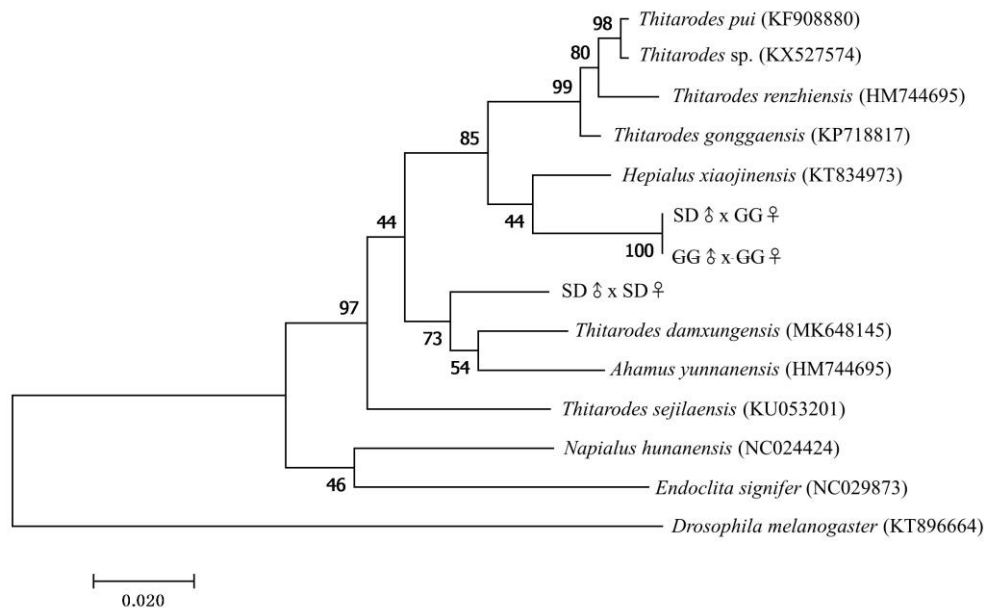

(f) *cox3*

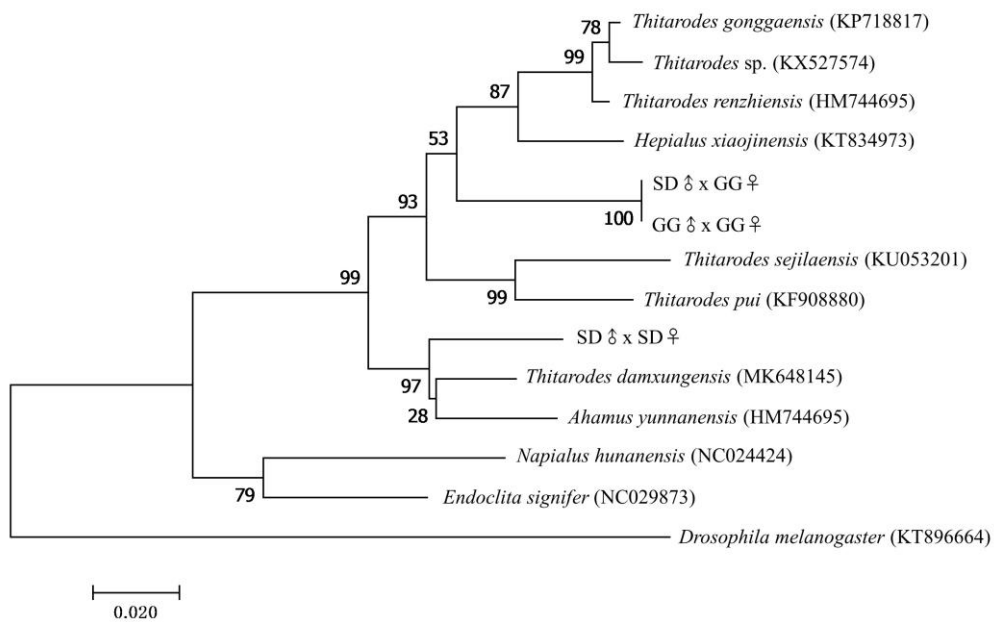

(g) *nad1*

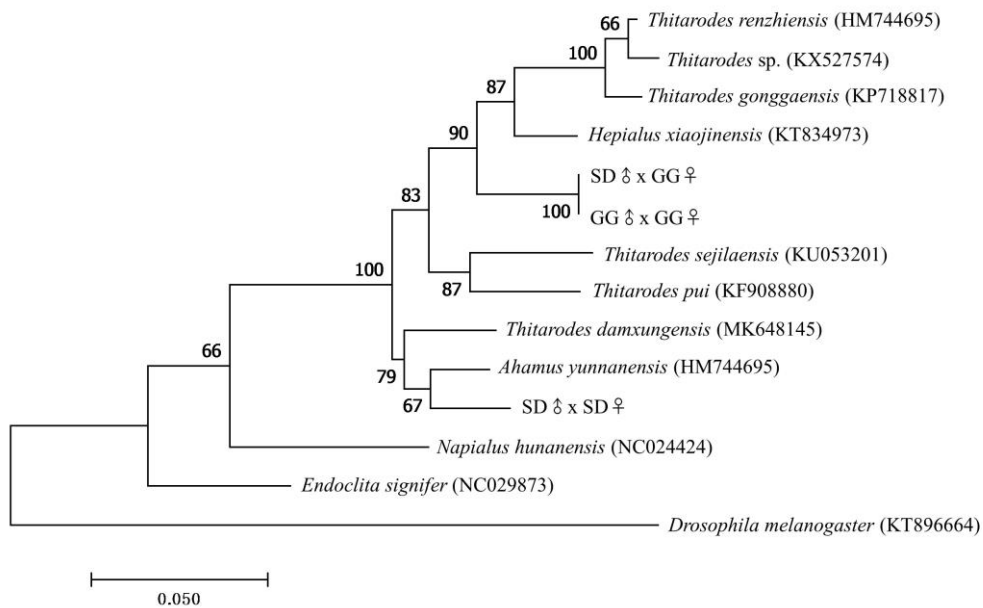

(h) *nad2*

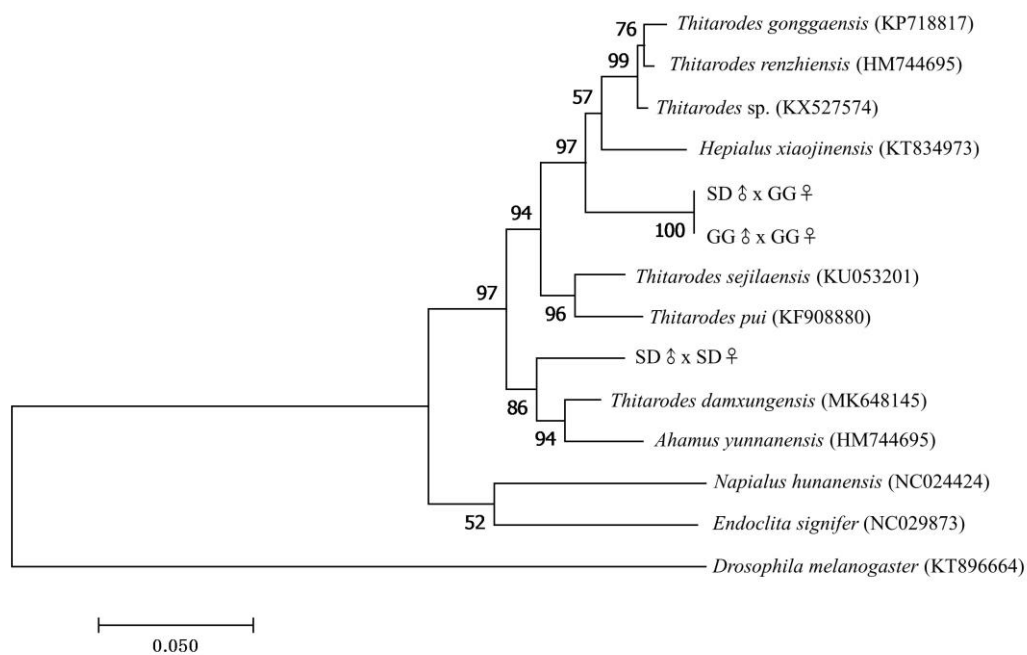

(i) *nad3*

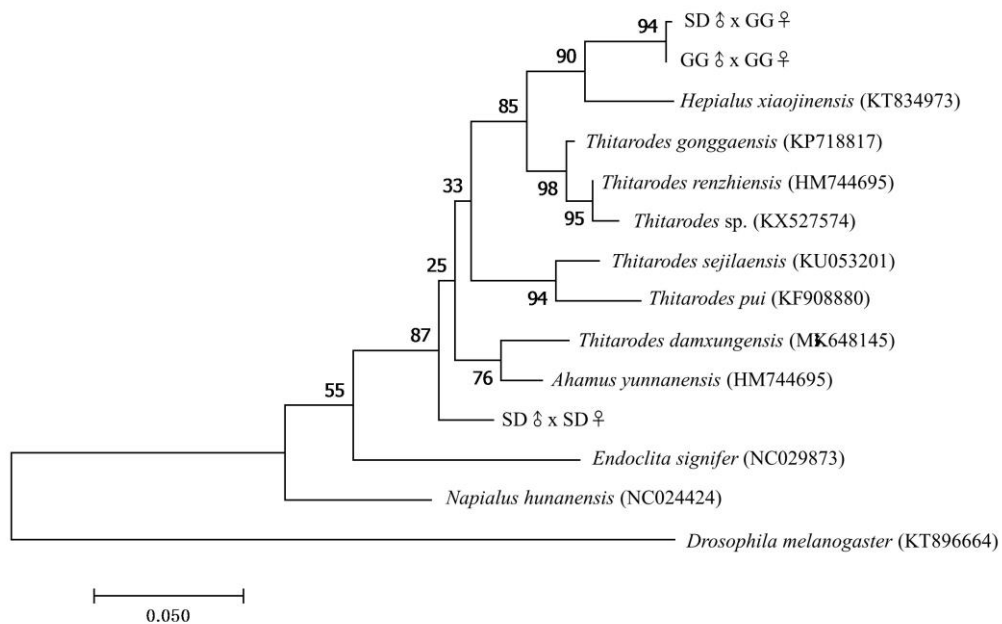

(j) *nad 4*

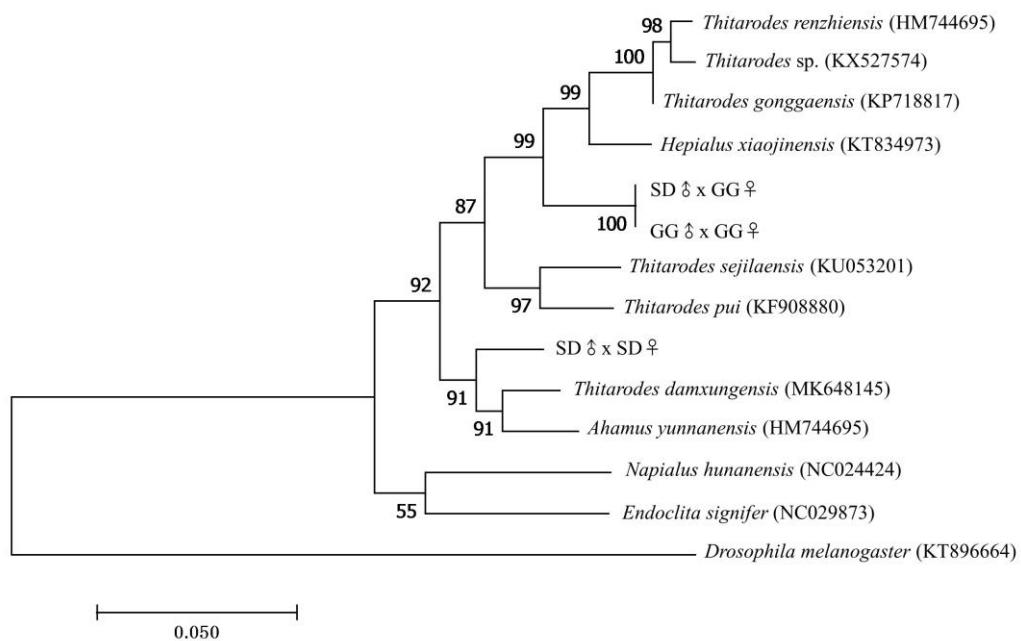

**(k) *nad4L***

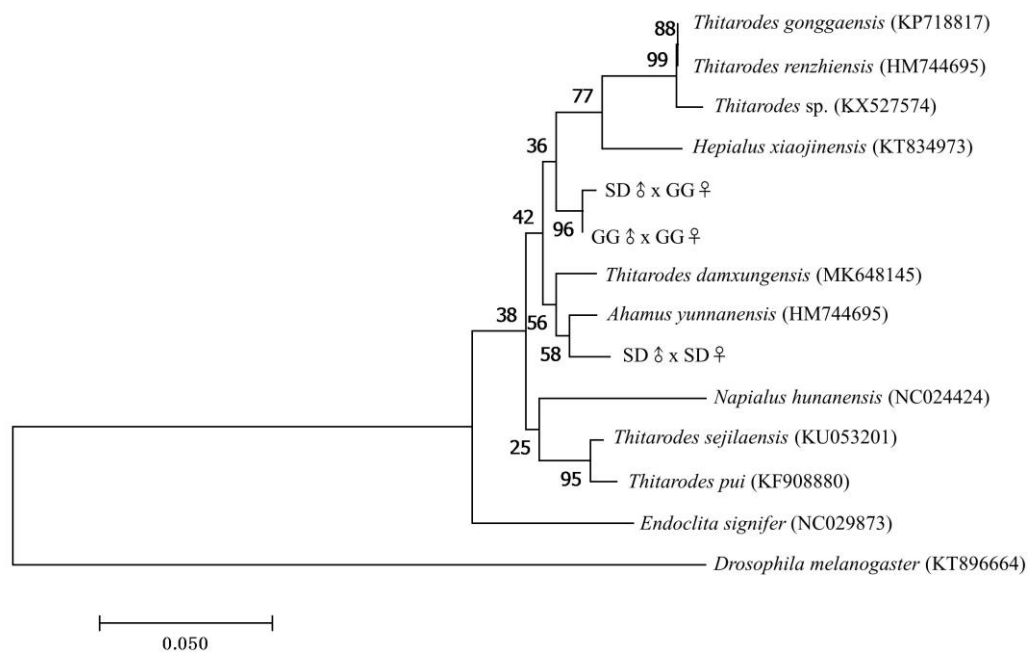

**(l) *nad5***

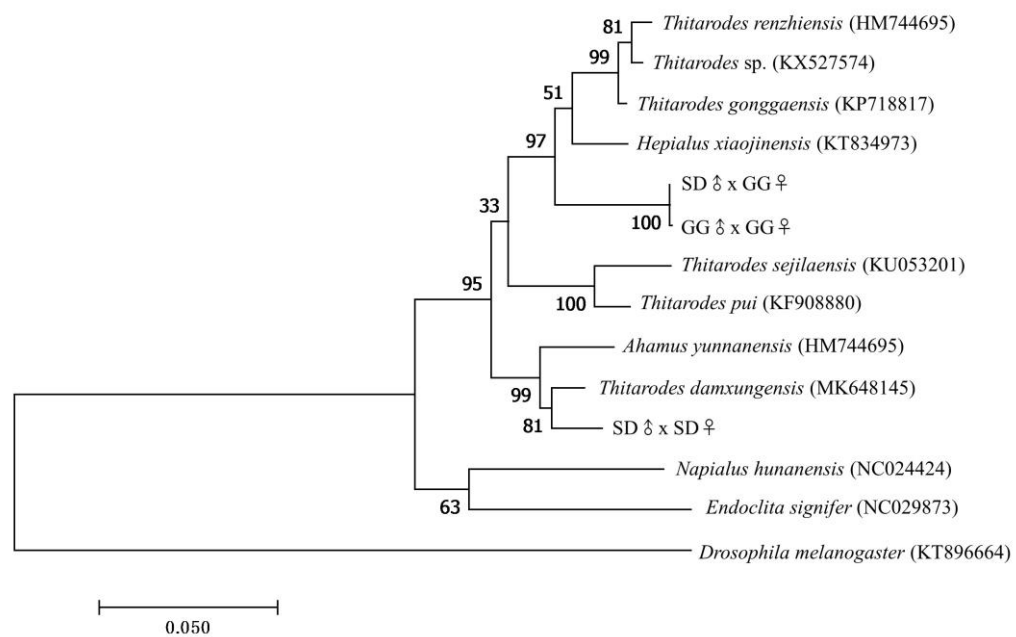

(m) *nad6*

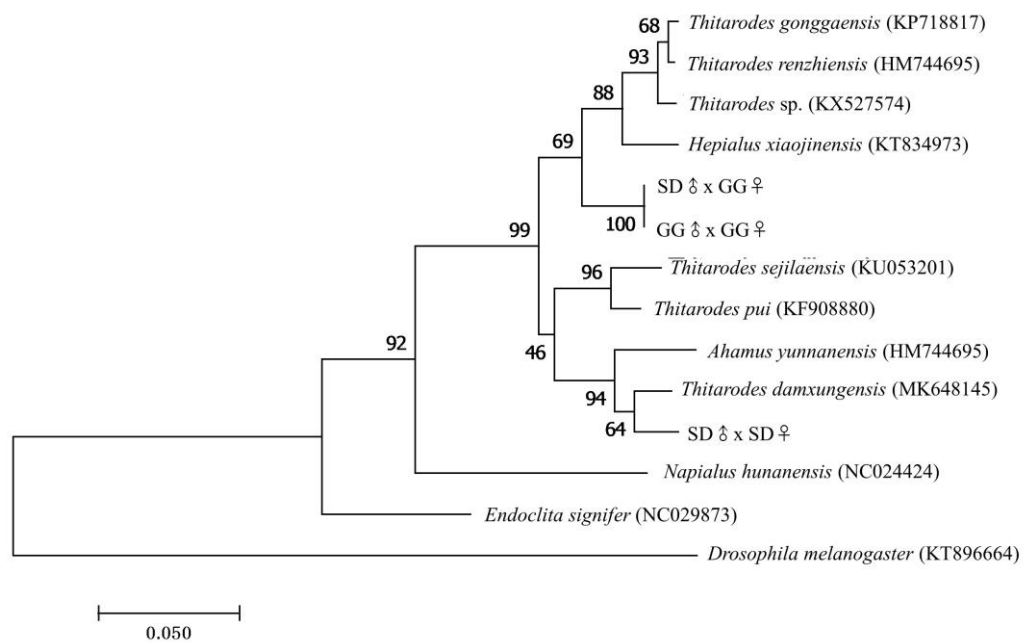

**Supplementary Figure S5.** The phylogenetic relationship constructed by the amino acid sequence derived from each PCG among 13 mitogenomes of Hepialidae insects and 1 outgroup.
