# Supplementary material for: Interspecific Hybridization and Complete Mitochondrial Genome Analysis of Two Ghost Moth Species
Source: MDPI journal article supplement (doi:10.3390/insects12111046), 2021-11-21
Supplement: s1 [file s1]

**Supplementary Table S2.** Mummification rates of the inbred larvae at 120 days post infection with *O. sinensis* fungus

| Populations | Fungus isolates |                |                |                |
|-------------|-----------------|----------------|----------------|----------------|
|             | KD              | XZ             | QH             | YN             |
| SD♂ x SD♀   | 55.56±3.57% Aa  | 32.96±1.48% Ab | 62.59±3.76% Ba | 53.89±0.56% Aa |
| GG♂ x GG♀   | 49.63±2.43% Aa  | 20.37±5.38% Ab | 62.96±1.96% Ba | 51.48±2.96% Aa |

Note: The columns with different capital letters indicated significant differences ( $p>0.05$ ). The lines with different lowercase letters indicated significant differences ( $p>0.05$ ).
