# Supplementary material for: Interspecific Hybridization and Complete Mitochondrial Genome Analysis of Two Ghost Moth Species
Source: MDPI journal article supplement (doi:10.3390/insects12111046), 2021-11-21
Supplement: s1 [file s1]

|             |                        |   |
|-------------|------------------------|---|
| SD ♂ x SD ♀ | AAATG <b>ATA</b> CAAAT | 4 |
| GG ♂ x GG ♀ | AAATG <b>ATA</b> CAAAT | 4 |
| SD ♂ x GG ♀ | AAATG <b>ATA</b> CAAAT | 4 |

$\Rightarrow$     $\Leftarrow$   
*atp6*   *atp8*

**Supplementary Figure S4.** Alignment of overlapping region between *atp8* and *atp6* across three *Thitarodes* populations
