# Supplementary material for: Interspecific Hybridization and Complete Mitochondrial Genome Analysis of Two Ghost Moth Species
Source: MDPI journal article supplement (doi:10.3390/insects12111046), 2021-11-21
Supplement: s1 [file s1]

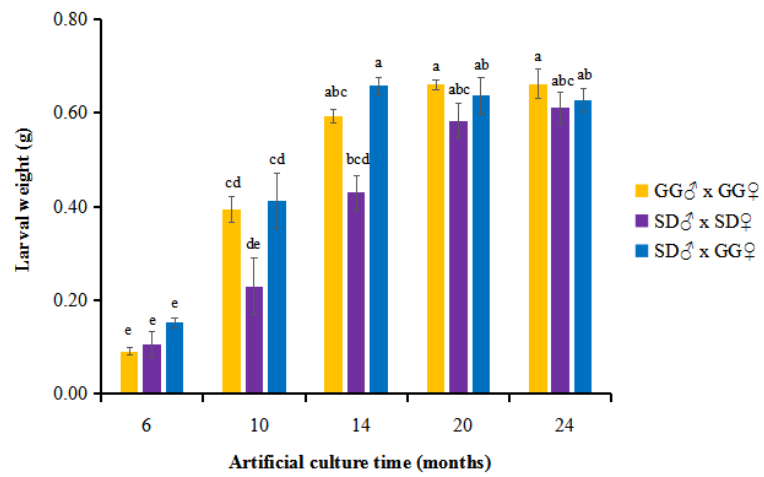

**Supplementary Figure S1.** Comparison of the fresh weights of the larvae of inbred and hybrid populations during the culture times. The columns with same letters indicated no significant differences ( $p>0.05$ ).
